# Supplementary material for: Highly efficient MoS2/WS2 heterojunctions for the CO2 reduction reaction: strong electronic transmission
Source: Royal Society of Chemistry journal article supplement (doi:10.1039/d3cp03822j), 2023-01-01
Supplement: d3cp03822j1.pdf [file d3cp03822j1.pdf]

# Highly efficient MoS<sub>2</sub>/WS<sub>2</sub> heterojunction for CO<sub>2</sub> reduction reaction: strong electronic transmission

Pengjie Fu,<sup>#,a</sup> Ying Xu,<sup>b</sup> Pingji Ge,<sup>a</sup> Xiaolong Li,<sup>a</sup> Jueming Yang,<sup>a</sup> Guixian Ge,<sup>\*,a</sup>

Xiaodong Yang,<sup>\*,a</sup>

<sup>a</sup> Xinjiang Production & Construction Corps Key Laboratory of Advanced Energy Storage Materials and Technology/College of Science, Shihezi University, Shihezi 832003, Xinjiang, China

<sup>b</sup> College of Foreign Languages, Shihezi University, Shihezi 832003, China

## Corresponding Author

\*Email: [geguixian@126.com](mailto:geguixian@126.com) (G.X.G.)

\*Email: [yangxiaodong1209@hotmail.com](mailto:yangxiaodong1209@hotmail.com) (X.D.Y.)

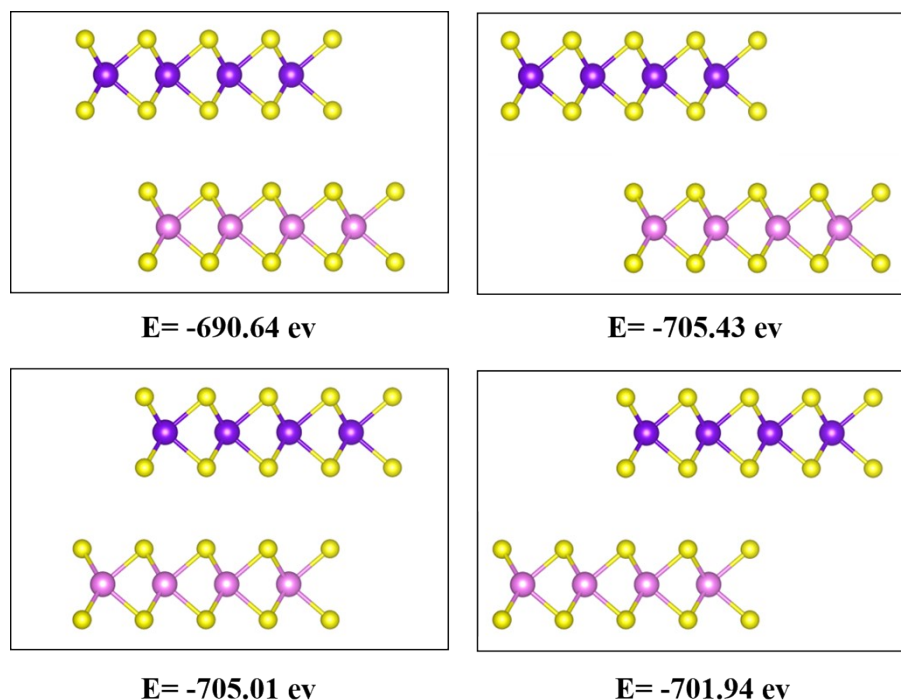

Fig.S1 The structure and energy of different stacking modes.

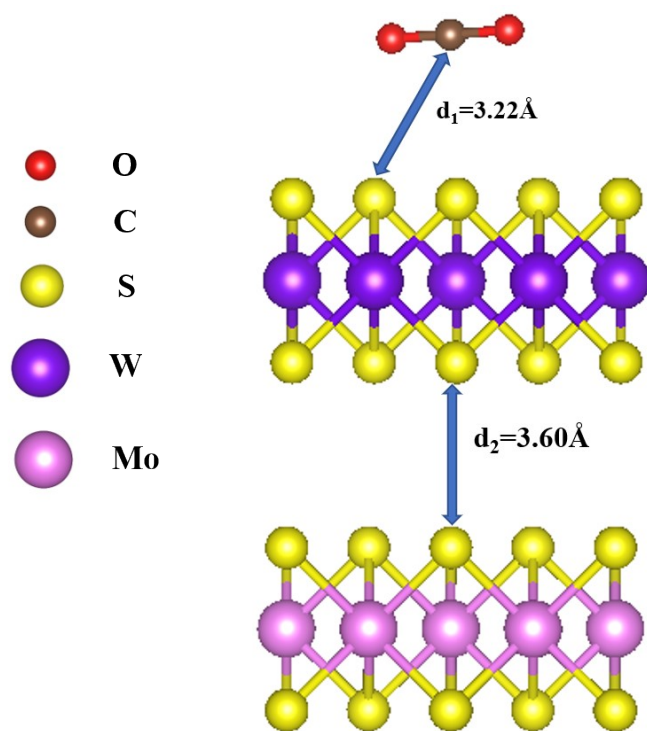

**Fig.S2** Adsorbed CO<sub>2</sub> molecule on MoS<sub>2</sub>/WS<sub>2</sub> surface.

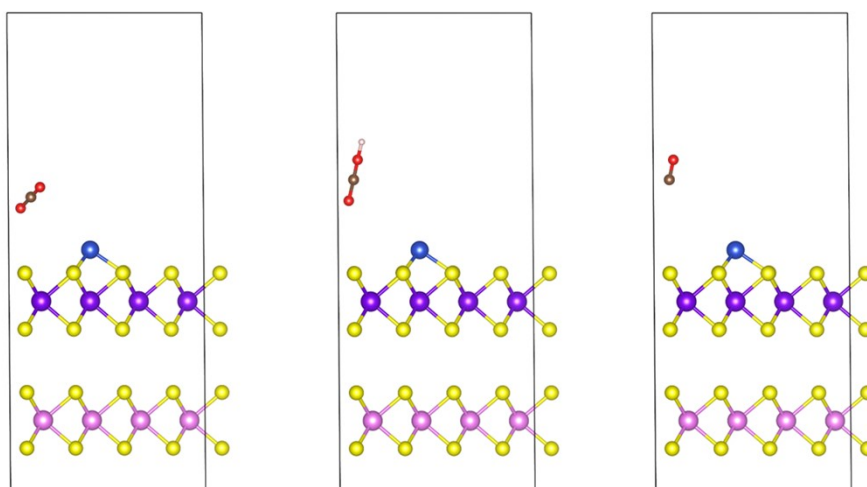

**Fig.S3** The optimized structure diagram of S atom in different intermediate states.

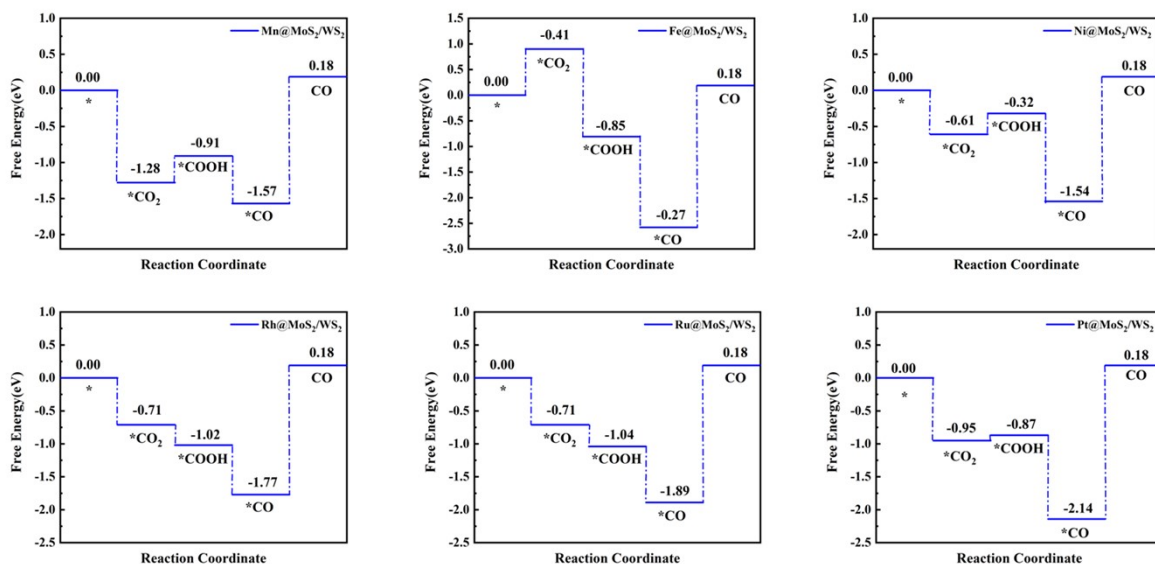

**Fig.S4** Energy variation of different adsorbed metal structures during the whole reaction process. (Mn, Fe, Ni, Rh, Ru, Pt).

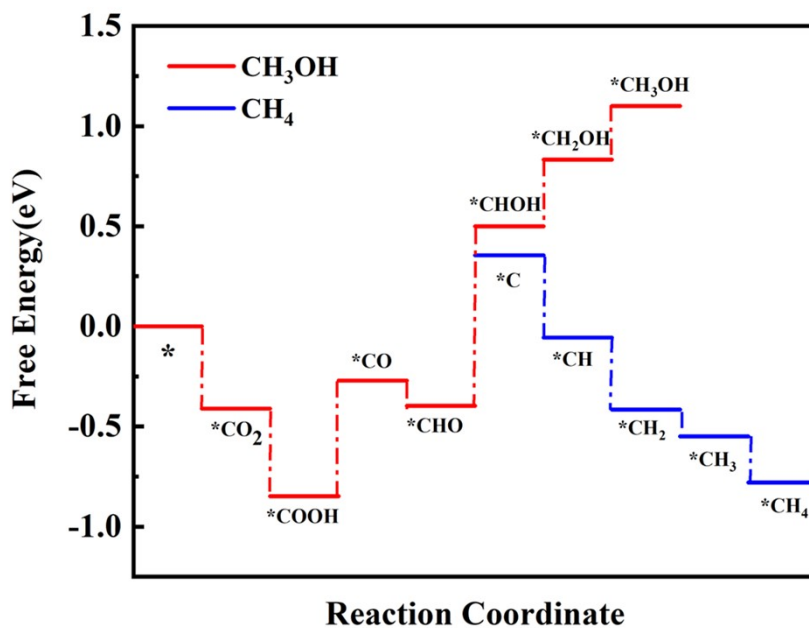

**Fig.S5** Free-energy profiles for CO<sub>2</sub>RR on Cu@MoS<sub>2</sub>/WS<sub>2</sub>.
